# Supplementary material for: Tickle fetishism: pleasure beyond playfulness
Source: Frontiers journal article supplement (doi:10.3389/fpsyg.2024.1342342), 2024-04-03
Supplement: Data_Sheet_1.PDF [file Data_Sheet_1.PDF]

## *Supplementary Material*

Table S1: List of questions

| Section | Question as in flowchart       | Full question                                                                                                                                                                                                                          | Answer type          | Targeted participants                   |
|---------|--------------------------------|----------------------------------------------------------------------------------------------------------------------------------------------------------------------------------------------------------------------------------------|----------------------|-----------------------------------------|
| 1       | Consent?                       | By selecting "yes" below, you acknowledge that you have read the survey description above and agree to participate. Please select "no" if you do not wish to participate.                                                              | single               | all                                     |
| 2       | Sexual identity                | Sexual identity                                                                                                                                                                                                                        | single + free text   | all                                     |
| 2       | Age                            | Age                                                                                                                                                                                                                                    | single               | all                                     |
| 2       | Background                     | What is your cultural background?                                                                                                                                                                                                      | single + free text   | all                                     |
| 2       | Sexual orientation             | Sexual orientation                                                                                                                                                                                                                     | single + free text   | all                                     |
| 2       | Ticklishness extent            | To what extent do you consider yourself ticklish?                                                                                                                                                                                      | single               | all                                     |
| 2       | Enjoyed child tickles?         | Did you enjoy being tickled when you were a child?                                                                                                                                                                                     | single               | all                                     |
| 2       | Knismesis or gargalesis        | There are two types of tickling: 1) itch-like sensation caused by light feather touch; 2) laughter-inducing vigorous touch on particular body parts including the armpits and soles of the feet. Which type of tickling do you prefer? | single               | all                                     |
| 3       | Tickling tool                  | Which of the following do you use for tickling? (Select all that apply)                                                                                                                                                                | multiple + free text | those who like tickling / being tickled |
| 3       | Tickling partner               | Who do you tickle / who tickles you? (Select all that apply)                                                                                                                                                                           | multiple + free text | those who like tickling / being tickled |
| 3       | Tickler or ticklee             | Do you prefer to tickle or to be tickled?                                                                                                                                                                                              | single               | those who like tickling / being tickled |
| 4       | Ticklers enjoy being tickled?  | Do you enjoy being tickled?                                                                                                                                                                                                            | single               | those who like tickling (ticklers)      |
| 4       | Body parts you enjoy tickling? | Please indicate which body parts of other people you prefer for each type of tickling and fetishism other than tickling (select all that apply)                                                                                        | multiple             | those who like tickling (ticklers)      |
| 4       |                                | If you select "Other" body parts, please specify                                                                                                                                                                                       | free text            | those who like tickling (ticklers)      |
| 4       | Is tickling a sexual activity? | Do you consider tickling to be a sexual activity for you?                                                                                                                                                                              | single               | those who like tickling (ticklers)      |
| 5       | Ticklees enjoy tickling?       | Do you enjoy tickling someone?                                                                                                                                                                                                         | single               | those who like being tickled (ticklees) |

# Supplementary Material

|   |                                     |                                                                                                                                                                 |                      |                                                                          |
|---|-------------------------------------|-----------------------------------------------------------------------------------------------------------------------------------------------------------------|----------------------|--------------------------------------------------------------------------|
| 5 | Ticklishness change over time?      | When you are tickled, does your level of ticklishness change over the course of a continuous tickling?                                                          | single               | those who like being tickled (ticklees)                                  |
| 5 | Body parts you enjoy being tickled? | Please indicate which body parts of yourself you prefer for being tickled with each type of tickling, and fetishism other than tickling (select all that apply) | multiple             | those who like being tickled (ticklees)                                  |
| 5 |                                     | If you select "Other" body parts, please specify                                                                                                                | free text            | those who like being tickled (ticklees)                                  |
| 5 | Is tickling a sexual activity?      | Do you consider tickling to be a sexual activity for you?                                                                                                       | single               | those who like being tickled (ticklees)                                  |
| 6 | Ticklishness change over time?      | When you are tickled, does your level of ticklishness change over the course of a continuous tickling?                                                          | single               | those who prefer both to tickle and to be tickled equally                |
| 6 | Body parts you enjoy tickling?      | Please indicate which body parts of other people you prefer for each type of tickling and fetishism other than tickling (select all that apply)                 | multiple             | those who prefer both to tickle and to be tickled equally                |
| 6 |                                     | If you select "Other" body parts, please specify                                                                                                                | free text            | those who prefer both to tickle and to be tickled equally                |
| 6 | Body parts you enjoy being tickled? | Please indicate which body parts of yourself you prefer for being tickled with each type of tickling, and fetishism other than tickling (select all that apply) | multiple             | those who prefer both to tickle and to be tickled equally                |
| 6 |                                     | If you select "Other" body parts, please specify                                                                                                                | free text            | those who prefer both to tickle and to be tickled equally                |
| 6 | Is tickling a sexual activity?      | Do you consider tickling to be a sexual activity for you?                                                                                                       | single               | those who prefer both to tickle and to be tickled equally                |
| 7 | Aspect of arousal?                  | In what aspects of tickling someone do you experience sexual arousal? (Select all that apply)                                                                   | multiple + free text | those who prefer to tickle someone as a sexual activity (sexual tickler) |
| 8 | Aspect of arousal?                  | In what aspects of being tickled do you experience sexual arousal? (Select all that apply)                                                                      | multiple + free text | those who prefer to be tickled as a sexual activity (sexual ticklee)     |
| 8 | Orgasm by tickling alone?           | Do you experience orgasm (ejaculation in men) with tickling alone without genital stimulation?                                                                  | single               | those who prefer to be tickled as a sexual activity (sexual ticklee)     |
| 8 | Tickle distress?                    | Do you experience distress when you are tickled?                                                                                                                | single               | those who prefer to be                                                   |

|    |                                        |                                                                                                                            |                      |                                                                                                   |
|----|----------------------------------------|----------------------------------------------------------------------------------------------------------------------------|----------------------|---------------------------------------------------------------------------------------------------|
|    |                                        |                                                                                                                            |                      | tickled as a sexual activity (sexual ticklee)                                                     |
| 9  | Aspect of arousal?                     | In what aspects of tickling someone do you experience sexual arousal? (Select all that apply)                              | multiple + free text | those who prefer both to tickle and to be tickled as a sexual activity (sexual tickler / ticklee) |
| 9  | Aspect of arousal?                     | In what aspects of being tickled do you experience sexual arousal? (Select all that apply)                                 | multiple + free text | those who prefer both to tickle and to be tickled as a sexual activity (sexual tickler / ticklee) |
| 9  | Orgasm by tickling alone?              | Do you experience orgasm (ejaculation in men) with tickling alone without genital stimulation?                             | single               | those who prefer both to tickle and to be tickled as a sexual activity (sexual tickler / ticklee) |
| 9  | Tickle distress?                       | Do you experience distress when you are tickled?                                                                           | single               | those who prefer both to tickle and to be tickled as a sexual activity (sexual tickler / ticklee) |
| 10 | BDSM arousal?                          | Do you feel sexually aroused by BDSM acts other than tickling?                                                             | single               | those who consider tickling is a sexual activity                                                  |
| 10 | Sexual satisfaction by tickling alone? | Is your sexual desire satisfied simply by tickling / being tickled?                                                        | single               | those who consider tickling is a sexual activity                                                  |
| 10 | Sexual satisfaction without tickling?  | To what extent can your sexual desire be satisfied by sexual activity that does not involve tickling?                      | single               | those who consider tickling is a sexual activity                                                  |
| 10 | Post orgasm tickling desire decrease?  | Do you experience a decrease in desire to tickle or be tickled after orgasm (ejaculation in men)?                          | single               | those who consider tickling is a sexual activity                                                  |
| 10 | Tickling duration                      | How frequently do you engage in tickling as sexual activity?                                                               | single               | those who consider tickling is a sexual activity                                                  |
| 10 | Tickling frequency                     | During a tickling session as a sexual activity, how long do you typically perform the tickling act continuously each time? | single               | those who consider tickling is a sexual activity                                                  |
| 10 | Age of becoming sexually active        | At what age did you first engage in sexual activity?                                                                       | single               | those who consider                                                                                |

## Supplementary Material

|           |                                      |                                                                                    |           |                                                  |
|-----------|--------------------------------------|------------------------------------------------------------------------------------|-----------|--------------------------------------------------|
|           |                                      |                                                                                    |           | tickling is a sexual activity                    |
| <b>10</b> | Unwanted sex?                        | Have you ever experienced any unwanted sexual experiences during your childhood?   | single    | those who consider tickling is a sexual activity |
| <b>10</b> | Episode that led to tickle fetishism | Please describe any episode that you think led you to develop a tickling fetishism | free text | those who consider tickling is a sexual activity |

Table S2: Gender-based statistics

|                                     | <b>Males</b> |             | <b>Females</b> |             |                   |           |                |
|-------------------------------------|--------------|-------------|----------------|-------------|-------------------|-----------|----------------|
| <b>Ticklishness extent</b>          | <b>N</b>     | <b>%</b>    | <b>N</b>       | <b>%</b>    | <b>Chi-square</b> | <b>DF</b> | <b>p-value</b> |
| Completely unticklish               | 19           | 4%          | 0              | 0%          | 18.53             | 4         | < 0.001        |
| Somewhat unticklish                 | 51           | 10%         | 10             | 7%          |                   |           |                |
| Neither ticklish nor unticklish     | 67           | 13%         | 9              | 6%          |                   |           |                |
| Somewhat ticklish                   | 221          | 41%         | 58             | 39%         |                   |           |                |
| Extremely ticklish                  | 176          | 33%         | 72             | 48%         |                   |           |                |
| <b>Total</b>                        | <b>534</b>   | <b>100%</b> | <b>149</b>     | <b>100%</b> |                   |           |                |
| <b>Tickle sensation preference</b>  | <b>N</b>     | <b>%</b>    | <b>N</b>       | <b>%</b>    | <b>Chi-square</b> | <b>DF</b> | <b>p-value</b> |
| I do like both equally              | 226          | 42%         | 72             | 48%         | 24.7531           | 3         | < 0.001        |
| Laughter-inducing vigorous touch    | 214          | 40%         | 33             | 22%         |                   |           |                |
| Light feather touch                 | 78           | 15%         | 42             | 28%         |                   |           |                |
| I do not like either                | 16           | 3%          | 2              | 1%          |                   |           |                |
| <b>Total</b>                        | <b>534</b>   | <b>100%</b> | <b>149</b>     | <b>100%</b> |                   |           |                |
| <b>To tickle or be tickled</b>      | <b>N</b>     | <b>%</b>    | <b>N</b>       | <b>%</b>    | <b>Chi-square</b> | <b>DF</b> | <b>p-value</b> |
| Both equally                        | 198          | 38%         | 26             | 18%         | 133.5785          | 2         | < 0.001        |
| To tickle                           | 194          | 37%         | 10             | 7%          |                   |           |                |
| To be tickled                       | 126          | 24%         | 111            | 76%         |                   |           |                |
| <b>Total</b>                        | <b>518</b>   | <b>100%</b> | <b>147</b>     | <b>100%</b> |                   |           |                |
| <b>Enjoy childhood tickles</b>      | <b>N</b>     | <b>%</b>    | <b>N</b>       | <b>%</b>    | <b>Chi-square</b> | <b>DF</b> | <b>p-value</b> |
| Yes                                 | 244          | 46%         | 91             | 61%         | 12.1728           | 2         | 0.002274       |
| No                                  | 184          | 34%         | 32             | 21%         |                   |           |                |
| I am not sure / I don't remember    | 106          | 20%         | 26             | 17%         |                   |           |                |
| <b>Total</b>                        | <b>534</b>   | <b>100%</b> | <b>149</b>     | <b>100%</b> |                   |           |                |
| <b>Ticklishness change</b>          | <b>N</b>     | <b>%</b>    | <b>N</b>       | <b>%</b>    | <b>Chi-square</b> | <b>DF</b> | <b>p-value</b> |
| It's getting somewhat less ticklish | 60           | 19%         | 12             | 9%          | 20.483            | 6         | 0.00227        |
| It's getting less and less ticklish | 6            | 2%          | 4              | 3%          |                   |           |                |
| Ticklishness does not change        | 44           | 14%         | 14             | 10%         |                   |           |                |
| It's getting somewhat more ticklish | 55           | 17%         | 38             | 28%         |                   |           |                |
| It's getting more and more ticklish | 59           | 18%         | 36             | 26%         |                   |           |                |
| It's different every time           | 51           | 16%         | 23             | 17%         |                   |           |                |
| I don't know                        | 49           | 15%         | 10             | 7%          |                   |           |                |
| <b>Total</b>                        | <b>324</b>   | <b>100%</b> | <b>137</b>     | <b>100%</b> |                   |           |                |
| <b>Ticklers enjoy being tickled</b> | <b>N</b>     | <b>%</b>    | <b>N</b>       | <b>%</b>    | <b>Chi-square</b> | <b>DF</b> | <b>p-value</b> |
| I dislike being tickled             | 28           | 14%         | 1              | 10%         | 3.357             | 4         | 0.5            |
| I don't really like being tickled   | 39           | 20%         | 1              | 10%         |                   |           |                |
| I'm neutral on being tickled        | 50           | 26%         | 4              | 40%         |                   |           |                |
| Being tickled is okay with me       | 51           | 26%         | 4              | 40%         |                   |           |                |

|                                         |            |             |            |             |                   |           |                       |
|-----------------------------------------|------------|-------------|------------|-------------|-------------------|-----------|-----------------------|
| I enjoy being tickled                   | 26         | 13%         | 0          | 0%          |                   |           |                       |
| <b>Total</b>                            | <b>194</b> | <b>100%</b> | <b>10</b>  | <b>100%</b> |                   |           |                       |
| <b>Ticklees enjoy tickling</b>          | <b>N</b>   | <b>%</b>    | <b>N</b>   | <b>%</b>    | <b>Chi-square</b> | <b>DF</b> | <b><i>p</i>-value</b> |
| I dislike tickling someone              | 11         | 9%          | 5          | 5%          |                   |           |                       |
| I don't really enjoy tickling someone   | 10         | 8%          | 14         | 13%         |                   |           |                       |
| I'm neutral on tickling someone         | 22         | 17%         | 30         | 27%         |                   |           |                       |
| I somewhat enjoy tickling someone       | 44         | 35%         | 40         | 36%         |                   |           |                       |
| I enjoy tickling someone                | 39         | 31%         | 22         | 20%         |                   |           |                       |
| <b>Total</b>                            | <b>126</b> | <b>100%</b> | <b>111</b> | <b>100%</b> |                   |           |                       |
| <b>Sexual arousal for being tickled</b> | <b>N</b>   | <b>%</b>    | <b>N</b>   | <b>%</b>    | <b>Chi-square</b> | <b>DF</b> | <b><i>p</i>-value</b> |
| Physical sensation                      | 218        | 67%         | 73         | 53%         | 3.23              | 3         | 0.3575                |
| Helplessness and submissiveness         | 174        | 54%         | 64         | 47%         |                   |           |                       |
| Anticipation                            | 176        | 54%         | 58         | 42%         |                   |           |                       |
| Feeling enjoyable                       | 0          | 0%          | 1          | 1%          |                   |           |                       |
| <b>Total</b>                            | <b>324</b> | <b>100%</b> | <b>137</b> | <b>100%</b> |                   |           |                       |
| <b>Sexual arousal for tickling</b>      | <b>N</b>   | <b>%</b>    | <b>N</b>   | <b>%</b>    | <b>Chi-square</b> | <b>DF</b> | <b><i>p</i>-value</b> |
| Ticklee's body reactions                | 285        | 73%         | 21         | 58%         | 0.621             | 6         | 0.996                 |
| Ticklee's voice                         | 271        | 69%         | 18         | 50%         |                   |           |                       |
| Sense of power                          | 275        | 70%         | 17         | 47%         |                   |           |                       |
| Touching ticklee's body                 | 217        | 55%         | 13         | 36%         |                   |           |                       |
| Helplessness                            | 1          | 0%          | 0          | 0%          |                   |           |                       |
| Partner's submission                    | 1          | 0%          | 0          | 0%          |                   |           |                       |
| Tickle anticipation                     | 1          | 0%          | 0          | 0%          |                   |           |                       |
| <b>Total</b>                            | <b>392</b> | <b>100%</b> | <b>36</b>  | <b>100%</b> |                   |           |                       |

Table S3: Correlation matrix significance

|                                 |                                      | <b>Correlation<br/>coefficient</b> | <b>p-value</b> | <b>DF</b> |
|---------------------------------|--------------------------------------|------------------------------------|----------------|-----------|
| BDSM arousal                    | sexual satisfaction without tickling | 0.27                               | 7.94E-06       | 847       |
| current age                     | sexually active age                  | 0.22                               | 0.000          | 1092      |
| sexual satisfaction by tickling | sexual satisfaction without tickling | -0.21                              | 0.001          | 915       |
| tickling frequency              | sexual satisfaction without tickling | -0.20                              | 0.001          | 795       |
| sexual satisfaction by tickling | orgasm by tickling                   | 0.24                               | 0.003          | 793       |
| tickling duration               | post orgasm tickling desire decrease | -0.17                              | 0.004          | 997       |
| ticklishness extent             | BDSM arousal                         | 0.17                               | 0.005          | 1164      |
| ticklishness change             | orgasm by tickling                   | 0.22                               | 0.006          | 628       |
| orgasm by tickling              | sexual satisfaction without tickling | -0.22                              | 0.006          | 680       |
| ticklishness extent             | ticklers enjoy being tickled         | 0.25                               | 0.007          | 926       |
| ticklers enjoy being tickled    | BDSM arousal                         | 0.23                               | 0.015          | 654       |
| ticklers enjoy being tickled    | current age                          | -0.22                              | 0.020          | 926       |
| ticklishness extent             | tickling duration                    | 0.14                               | 0.024          | 1232      |
| ticklishness change             | sexually active age                  | -0.17                              | 0.031          | 723       |
| ticklishness change             | tickling frequency                   | 0.17                               | 0.032          | 743       |
| ticklishness extent             | current age                          | -0.13                              | 0.036          | 1436      |
| tickling frequency              | tickling duration                    | 0.13                               | 0.038          | 908       |
| ticklers enjoy being tickled    | sexually active age                  | -0.19                              | 0.041          | 582       |
| tickling frequency              | sexual satisfaction by tickling      | 0.12                               | 0.054          | 908       |
| ticklishness extent             | post orgasm tickling desire decrease | -0.12                              | 0.059          | 1201      |
| tickling duration               | tickle distress                      | 0.15                               | 0.067          | 853       |
| ticklers enjoy being tickled    | sexual satisfaction without tickling | 0.17                               | 0.072          | 609       |
| ticklishness change             | tickles enjoy tickling               | 0.21                               | 0.073          | 599       |
| current age                     | tickles enjoy tickling               | -0.21                              | 0.078          | 968       |
| tickling duration               | tickles enjoy tickling               | -0.20                              | 0.094          | 764       |
| tickling duration               | current age                          | 0.10                               | 0.100          | 1232      |
| sexual satisfaction by tickling | post orgasm tickling desire decrease | -0.10                              | 0.113          | 997       |
| tickling frequency              | orgasm by tickling                   | 0.13                               | 0.113          | 673       |
| tickling duration               | sexual satisfaction without tickling | -0.10                              | 0.117          | 915       |
| ticklishness change             | sexual satisfaction without tickling | -0.12                              | 0.127          | 750       |
| ticklishness change             | post orgasm tickling desire decrease | -0.12                              | 0.130          | 832       |
| ticklishness extent             | ticklishness change                  | 0.12                               | 0.134          | 1067      |
| ticklishness change             | sexual satisfaction by tickling      | 0.12                               | 0.138          | 863       |
| orgasm by tickling              | post orgasm tickling desire decrease | -0.12                              | 0.145          | 762       |
| tickling frequency              | tickle distress                      | 0.12                               | 0.153          | 733       |
| tickle distress                 | sexually active age                  | 0.11                               | 0.156          | 713       |
| sexually active age             | tickles enjoy tickling               | -0.16                              | 0.171          | 624       |
| orgasm by tickling              | sexually active age                  | -0.11                              | 0.190          | 653       |
| BDSM arousal                    | tickling duration                    | 0.08                               | 0.202          | 960       |
| BDSM arousal                    | sexually active age                  | -0.07                              | 0.232          | 820       |
| tickle distress                 | current age                          | -0.09                              | 0.243          | 1057      |

|                                      |                                      |       |       |      |
|--------------------------------------|--------------------------------------|-------|-------|------|
| sexual satisfaction by tickling      | tickling duration                    | 0.06  | 0.293 | 1028 |
| sexual satisfaction by tickling      | sexually active age                  | 0.06  | 0.302 | 888  |
| ticklers enjoy being tickled         | tickling frequency                   | 0.10  | 0.311 | 602  |
| orgasm by tickling                   | current age                          | -0.08 | 0.336 | 997  |
| tickling frequency                   | post orgasm tickling desire decrease | -0.06 | 0.342 | 877  |
| BDSM arousal                         | orgasm by tickling                   | -0.08 | 0.352 | 725  |
| ticklishness extent                  | sexually active age                  | -0.06 | 0.352 | 1092 |
| ticklishness extent                  | tickles enjoy tickling               | 0.11  | 0.354 | 968  |
| ticklishness change                  | tickling duration                    | 0.07  | 0.375 | 863  |
| tickle distress                      | post orgasm tickling desire decrease | -0.07 | 0.383 | 822  |
| tickle distress                      | tickles enjoy tickling               | -0.10 | 0.393 | 589  |
| sexual satisfaction by tickling      | tickles enjoy tickling               | 0.10  | 0.403 | 764  |
| sexually active age                  | sexual satisfaction without tickling | -0.05 | 0.408 | 775  |
| sexual satisfaction without tickling | post orgasm tickling desire decrease | 0.05  | 0.412 | 884  |
| ticklishness extent                  | sexual satisfaction without tickling | 0.05  | 0.430 | 1119 |
| tickles enjoy tickling               | post orgasm tickling desire decrease | -0.09 | 0.466 | 733  |
| BDSM arousal                         | tickling frequency                   | -0.04 | 0.467 | 840  |
| ticklishness extent                  | orgasm by tickling                   | 0.05  | 0.519 | 997  |
| tickles enjoy tickling               | sexual satisfaction without tickling | -0.08 | 0.519 | 651  |
| sexually active age                  | post orgasm tickling desire decrease | 0.04  | 0.533 | 857  |
| ticklers enjoy being tickled         | tickling duration                    | 0.06  | 0.554 | 722  |
| BDSM arousal                         | sexual satisfaction by tickling      | -0.03 | 0.579 | 960  |
| tickling frequency                   | current age                          | 0.03  | 0.588 | 1112 |
| BDSM arousal                         | current age                          | 0.03  | 0.615 | 1164 |
| tickle distress                      | orgasm by tickling                   | -0.04 | 0.627 | 618  |
| ticklers enjoy being tickled         | post orgasm tickling desire decrease | -0.05 | 0.633 | 691  |
| ticklishness change                  | current age                          | -0.04 | 0.642 | 1067 |
| BDSM arousal                         | post orgasm tickling desire decrease | -0.02 | 0.701 | 929  |
| ticklishness extent                  | tickle distress                      | 0.03  | 0.737 | 1057 |
| current age                          | post orgasm tickling desire decrease | 0.02  | 0.749 | 1201 |
| ticklers enjoy being tickled         | sexual satisfaction by tickling      | 0.03  | 0.769 | 722  |
| BDSM arousal                         | ticklishness change                  | 0.02  | 0.783 | 795  |
| tickle distress                      | sexual satisfaction without tickling | -0.02 | 0.823 | 740  |
| sexual satisfaction by tickling      | tickle distress                      | 0.02  | 0.829 | 853  |
| tickling frequency                   | tickles enjoy tickling               | 0.03  | 0.832 | 644  |
| ticklishness extent                  | sexual satisfaction by tickling      | -0.01 | 0.849 | 1232 |
| current age                          | sexual satisfaction without tickling | 0.01  | 0.851 | 1119 |
| BDSM arousal                         | tickle distress                      | -0.01 | 0.856 | 785  |
| tickling duration                    | sexually active age                  | 0.01  | 0.867 | 888  |
| ticklishness change                  | tickle distress                      | -0.01 | 0.892 | 688  |
| tickling frequency                   | sexually active age                  | 0.01  | 0.910 | 768  |
| ticklishness extent                  | tickling frequency                   | 0.00  | 0.937 | 1112 |
| BDSM arousal                         | tickles enjoy tickling               | -0.01 | 0.961 | 696  |
| tickling duration                    | orgasm by tickling                   | 0.00  | 0.964 | 793  |



|                                 |                         |      |       |      |
|---------------------------------|-------------------------|------|-------|------|
| orgasm by tickling              | ticklees enjoy tickling | 0.00 | 0.987 | 529  |
| sexual satisfaction by tickling | current age             | 0.00 | 0.997 | 1232 |

Table S4: Exploratory factor analysis of tickle fetishism

| Variables                            | Factor 1 | Factor 2 | Factor 3 | Communality | Uniqueness |
|--------------------------------------|----------|----------|----------|-------------|------------|
| Sexual satisfaction without tickling | -0.5     | 0.3      | -0.1     | 0.4         | 0.6        |
| Sexual satisfaction by tickling      | 0.4      | 0.1      | 0.1      | 0.2         | 0.8        |
| Orgasm by tickling                   | 0.4      | 0.0      | -0.2     | 0.2         | 0.8        |
| Tickling frequency                   | 0.4      | 0.0      | 0.1      | 0.2         | 0.8        |
| Ticklishness change                  | 0.4      | 0.2      | -0.2     | 0.2         | 0.8        |
| Ticklishness extent                  | 0.0      | 0.5      | -0.1     | 0.2         | 0.8        |
| BDSM arousal                         | -0.2     | 0.5      | 0.1      | 0.3         | 0.7        |
| Post orgasm tickling desire decrease | -0.1     | -0.3     | 0.0      | 0.1         | 0.9        |
| Sexually active age                  | 0.0      | -0.1     | 0.5      | 0.3         | 0.7        |
| Current age                          | 0.0      | 0.0      | 0.4      | 0.1         | 0.9        |
| Tickling duration                    | 0.3      | 0.2      | 0.3      | 0.2         | 0.8        |
| Tickle distress                      | 0.1      | 0.1      | 0.2      | 0.0         | 1.0        |
